# Supplementary material
Source: PubMed Central journal article supplement (PMC2740420)
Supplement: supp_M109.015164_jbc.M109.015164-1.pdf [file supp_M109.015164_jbc.M109.015164-1.pdf]

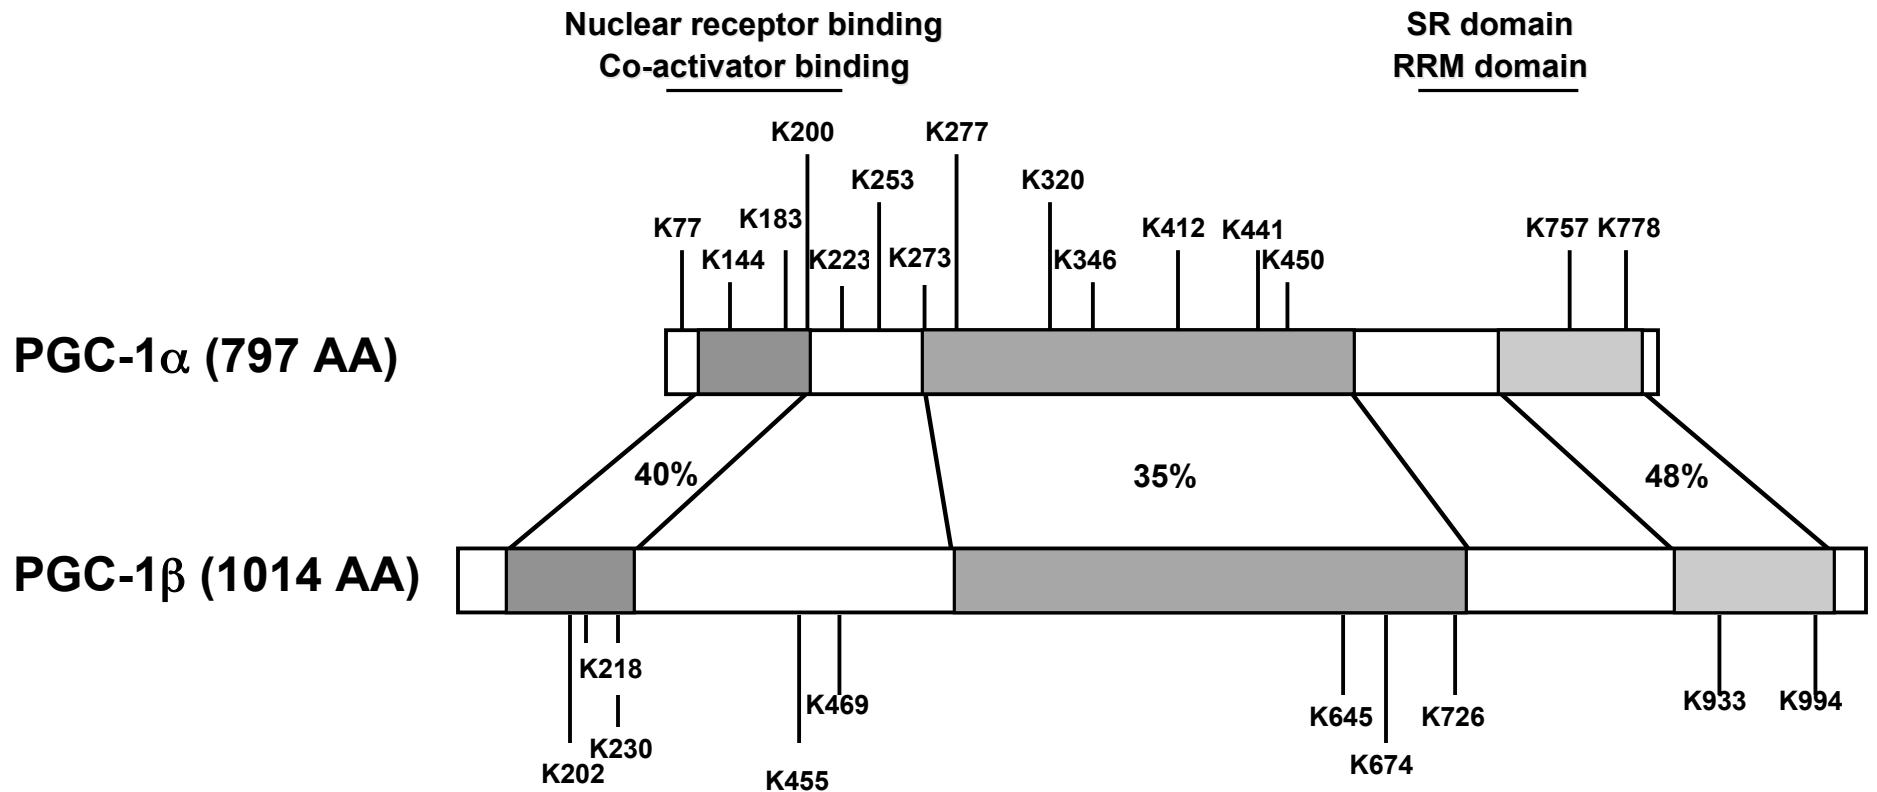

**Supplemental Figure (S1).** Approximate homology and acetylation sites found in PGC-1 $\alpha$  and PGC-1 $\beta$  (all sites from (19) except K220 and K223 from (17)). Percent sequence identity from (30). Domain localization refer to regions in mouse PGC-1 $\alpha$
